# Supplementary material for: Gallium nitride formation in liquid metal sonication
Source: Royal Society of Chemistry journal article supplement (doi:10.1039/d0tc04302h), 2020-01-01
Supplement: d0tc04302h1.pdf [file d0tc04302h1.pdf]

## Supplementary Information

### Gallium Nitride Formation in Liquid Metal

### Sonication

*Shengxiang Cai<sup>a</sup>, Mohannad Mayyas<sup>a</sup>, Maricruz G. Saborio<sup>a</sup>, Mohammad B. Ghasemian<sup>a</sup>, Jianbo Tang<sup>a</sup>, Torben Daeneke<sup>b</sup>, Jialuo Han<sup>a</sup>, Ali Asghar Esmailpour<sup>a</sup>, Francois-Marie Allieux<sup>\*a</sup>, and Kourosh Kalantar-Zadeh<sup>\*a</sup>*

*<sup>a</sup> School of Chemical Engineering, University of New South Wales (UNSW), Sydney, NSW 2052, Australia*

*<sup>b</sup> School of Engineering, RMIT University, Melbourne, VIC 3001, Australia*

*\*Emails: [f.allieux@unsw.edu.au](mailto:f.allieux@unsw.edu.au) and [k.kalantar-zadeh@unsw.edu.au](mailto:k.kalantar-zadeh@unsw.edu.au)*

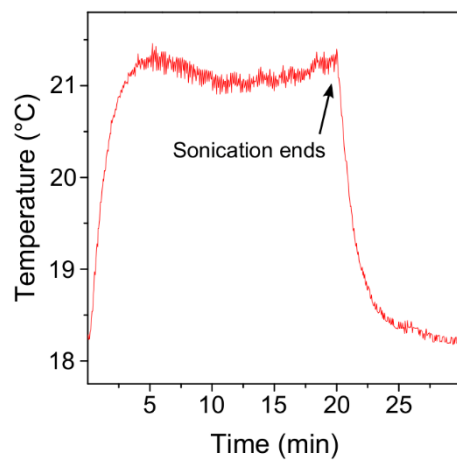

**Fig. S1** Thermal profile of the sonication process of LM-PVP-N<sub>2</sub>.

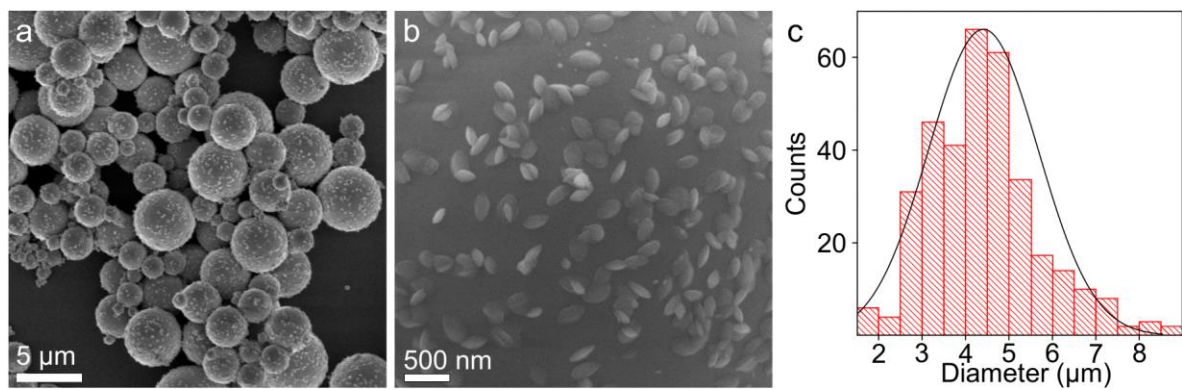

**Fig. S2** (a) SEM images of spherical particles obtained from EGaIn sonicated in DI water without surfactant or  $\text{N}_2$  bubbling. (b) Secondary features on the surface of spherical particles in (a). (c) Diameter distribution of the particles obtained in (a).

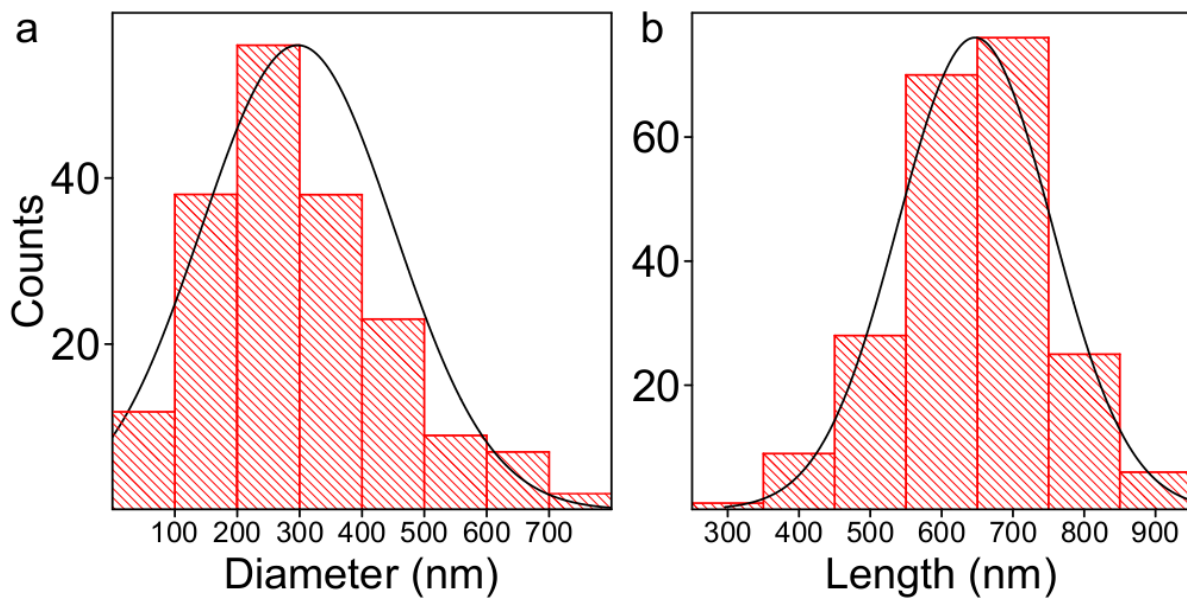

**Fig. S3** Average size of the output when the liquid metal is sonicated with PVP with (a) diameter distribution of spherical particles and (b) length distribution of non-spherical structures.

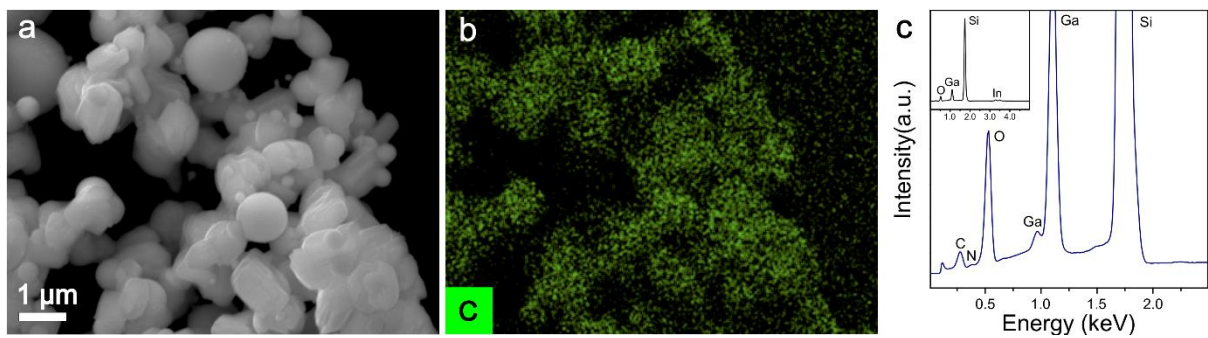

**Fig. S4** SEM/EDS analysis of the LM-PVP-N<sub>2</sub> sample. (a) Same selected area as Fig. 1d. (b) Carbon elemental mapping. (c) SEM/EDS spectrum of the selected area in (a).

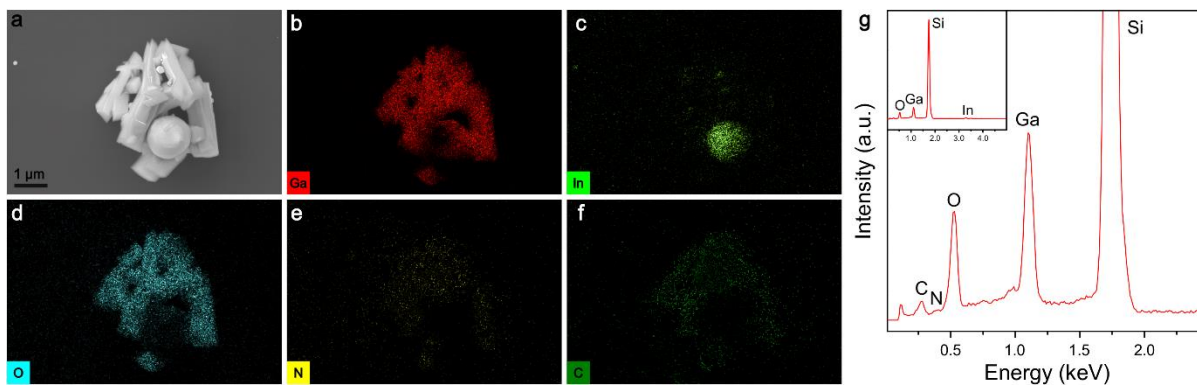

**Fig. S5** (a-f) SEM/EDS mapping of selected area of the LM-PVA-N<sub>2</sub> sample with Ga, In, O, N and C elements. (g) SEM/EDS spectrum of the selected area in (a).

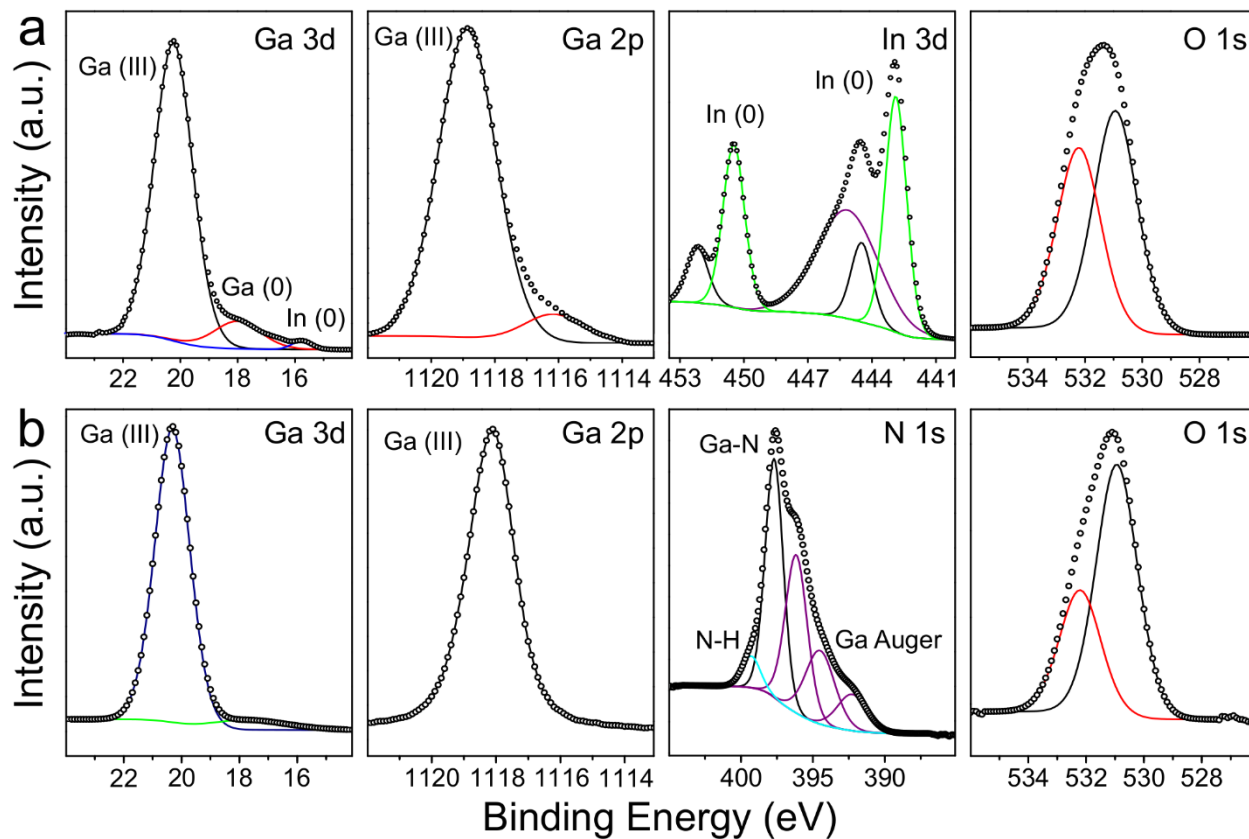

**Fig. S6** XPS spectra of (a) EGaIn sonicated in DI water without surfactant or N<sub>2</sub> bubbling in Ga 3d, Ga 2p, In 3d, and O 1s. (b) Commercially obtained GaN powder in Ga 3d, Ga 2p, N 1s, and O 1s.

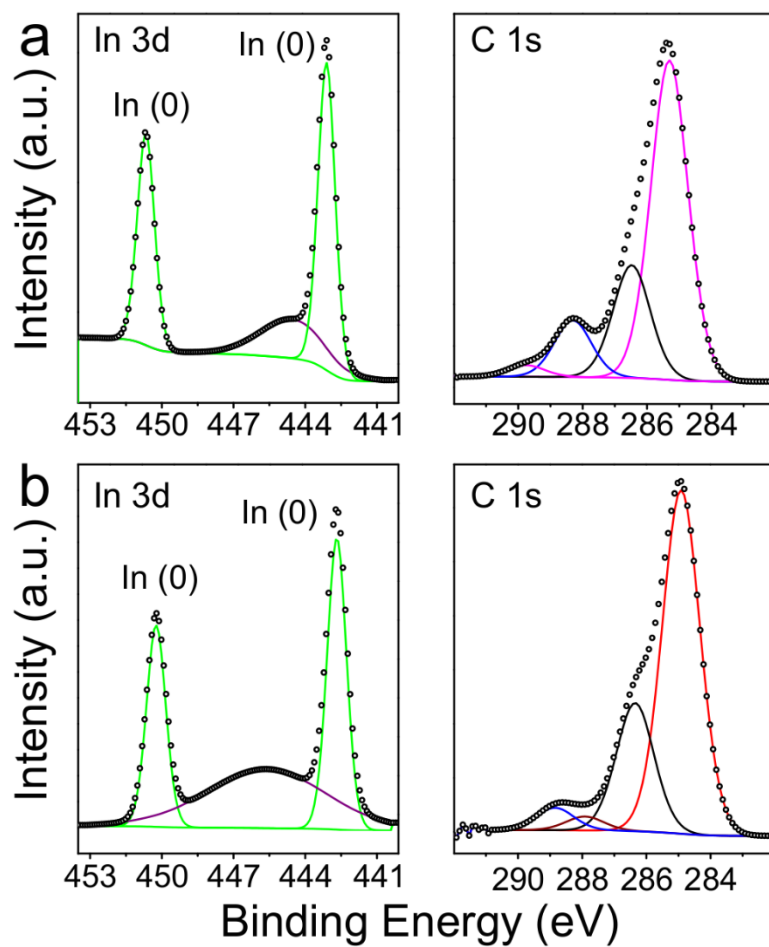

**Fig. S7** XPS spectra of In 3d and C 1s of the as-prepared NPs with (a) PVP and (b) PVA.



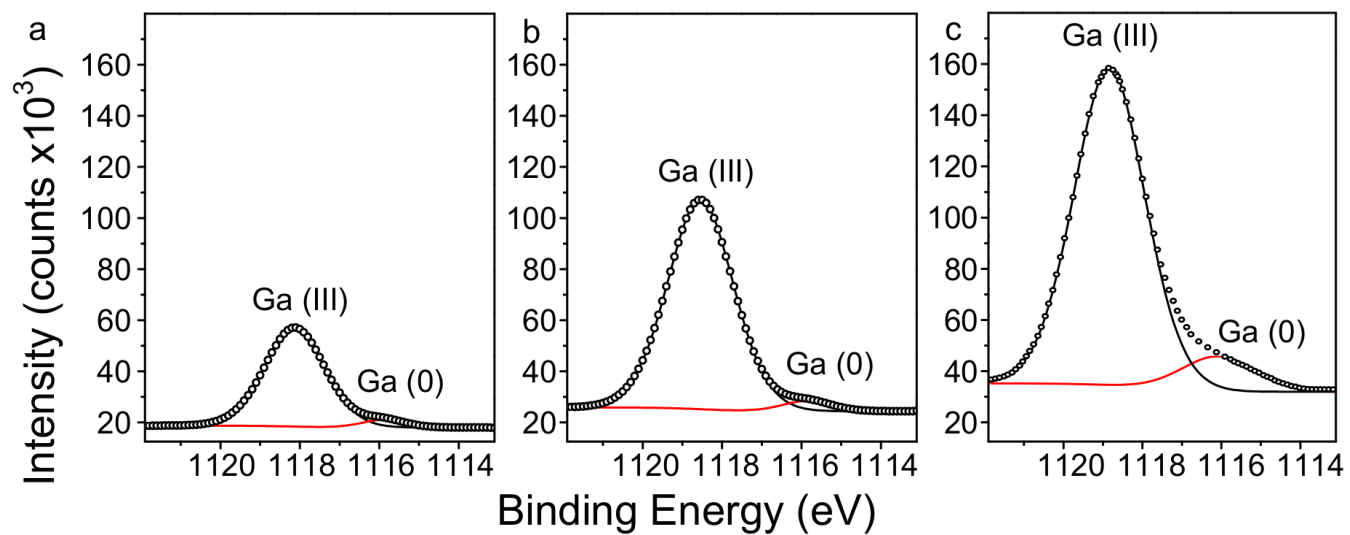

**Fig. S8** XPS spectra of Ga 2p without normalisation (a) LM-PVP-N<sub>2</sub>, (b) LM-PVA-N<sub>2</sub> and (c) LM-DIW-air sample.

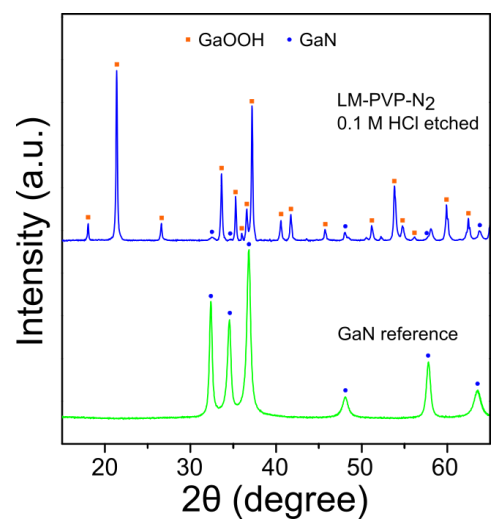

**Fig. S9** Full range XRD of the sample presented in Fig. 2d.

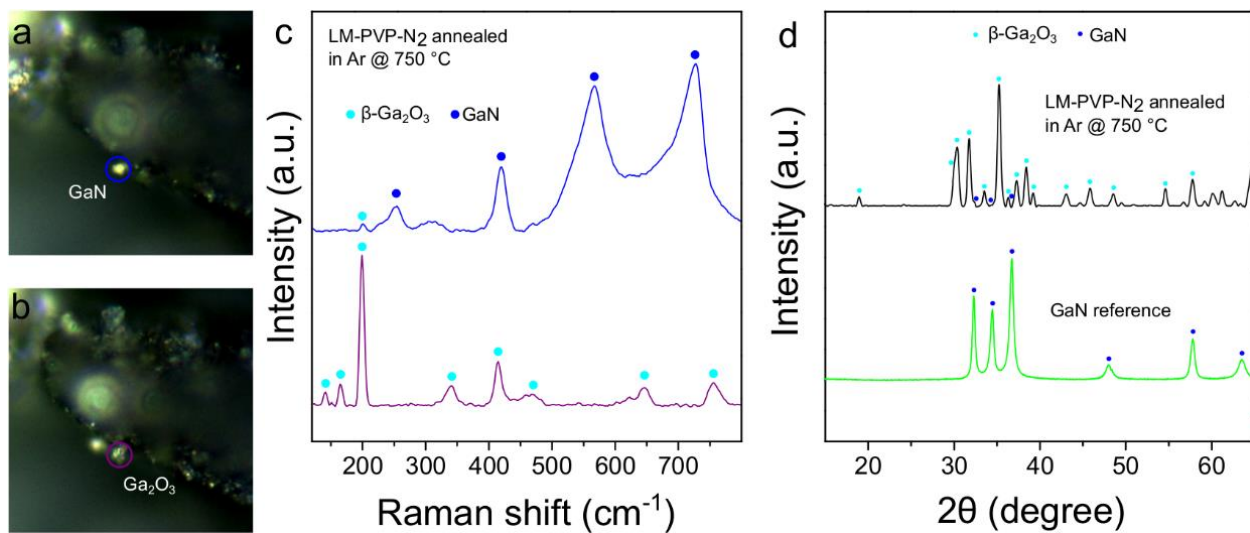

**Fig. S10** Characterisations of LM-PVP-N<sub>2</sub> after annealing for 7.0 hr at 750 °C under constant flow of Ar. Locations of the Raman spectra were taken (a) hexagonal GaN (highlighted blue in (c)) and (b) monoclinic  $\beta$ -Ga<sub>2</sub>O<sub>3</sub> (highlighted purple in (c)). (c) Raman spectra of the highlighted area. (d) XRD pattern of a reference GaN sample and the LM-PVP-N<sub>2</sub> after annealing.

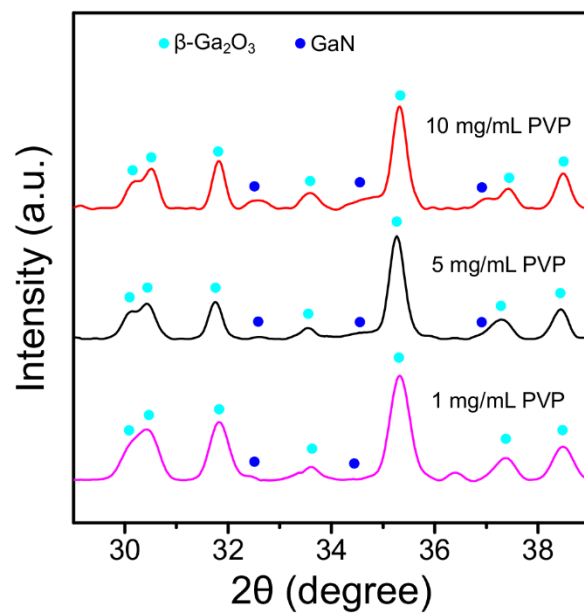

**Fig. S11** XRD of the LM-PVP-N<sub>2</sub> sample with different PVP concentrations.

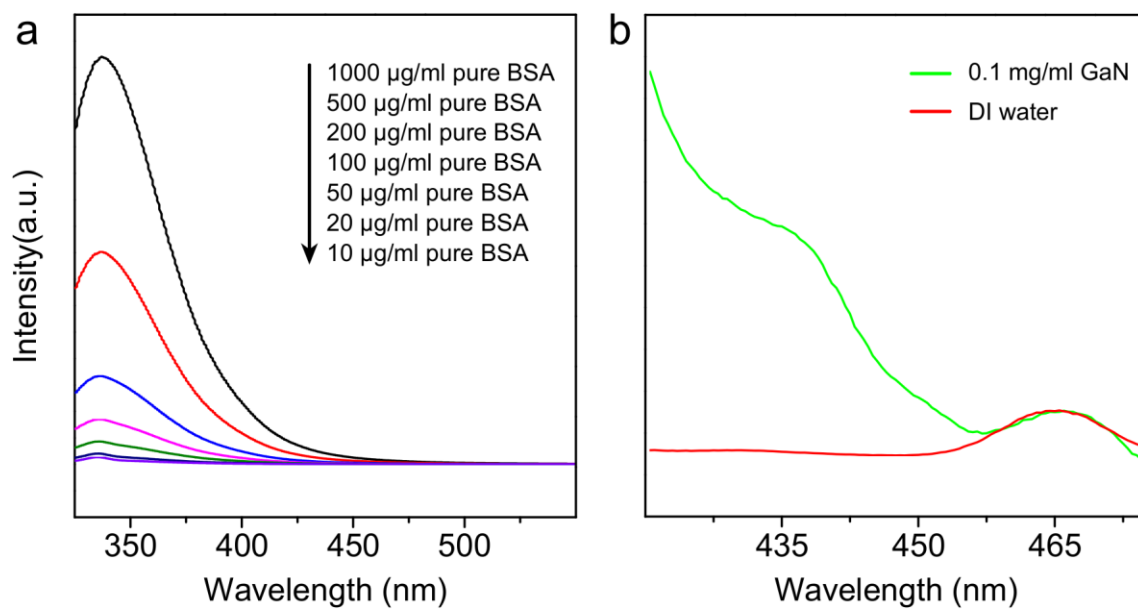

**Fig. S12** (a) Photoluminescence of various concentration of pure BSA water, excited at 300 nm. (b) Photoluminescence of 0.1 mg/ml GaN dispersed in DI water by gentle shaking and pure DI water, excited at 400 nm.

**Table S1.** Atomic percent (at%), XPS peak positions, full width at half maximum (FWHM) and peak attribution of the LM-PVP-N<sub>2</sub>.

| Name    | Position (eV) | FWHM | Atomic % | Attribution   |
|---------|---------------|------|----------|---------------|
| C1s A   | 285.4         | 1.65 | 16.88    | PVP           |
| C1s B   | 286.4         | 1.65 | 9.87     |               |
| C1s C   | 288.8         | 1.65 | 2.49     |               |
| C1s D   | 288.3         | 1.65 | 3.63     |               |
| O1s A   | 530.9         | 1.92 | 19.62    | GaOOH         |
| O1s B   | 532.2         | 1.92 | 12.51    | GaOOH         |
| N1s A   | 397.4         | 2.62 | 17.51    | GaN           |
| N1s B   | 400.2         | 2.62 | 7.22     | PVP           |
| In3d5 A | 443.1         | 1.52 | 0.81     | Metallic In   |
| In3d5 B | 444.5         | 1.52 | 0.18     | Metallic In   |
| Ga3d A  | 20.2          | 2.23 | 8.34     | GaOOH and GaN |
| Ga3d B  | 18.0          | 1.56 | 0.93     | Metallic Ga   |
